## Research Paper: Pathology

## Genetic variants in vitamin D signaling pathways and risk of gestational diabetes mellitus

Aiwu Shi<sup>1,2,3,\*</sup>, Juan Wen<sup>3,4,5,\*</sup>, Guangquan Liu<sup>4,\*</sup>, Heng Liu<sup>4</sup>, Ziyi Fu<sup>3,4</sup>, Jing Zhou<sup>2</sup>, Yao Zhu<sup>2</sup>, Yaoqiu Liu<sup>2</sup>, Xirong Guo<sup>3,4,5</sup> and Jianguo Xu<sup>1</sup>

<sup>1</sup> Department of Anaesthesiology, Jinling Hospital, School of Medicine, Nanjing University, Nanjing, China

<sup>2</sup> Department of MICU, Nanjing Maternity and Child Health Care Hospital Affiliated to Nanjing Medical University, Nanjing, China

<sup>3</sup> State Key Laboratory of Reproductive Medicine, Nanjing Maternity and Child Health Care Hospital Affiliated to Nanjing Medical University, Nanjing, China

<sup>4</sup> Nanjing Maternity and Child Health Care Institute, Nanjing Maternity and Child Health Care Hospital Affiliated to Nanjing Medical University, Nanjing, China

<sup>5</sup> Department of Children Health Care, Nanjing Maternity and Child Health Care Hospital Affiliated to Nanjing Medical University, Nanjing, China

\* These authors have contributed equally to this work

**Correspondence to:** Jianguo Xu, email: [jianguoxu2014@126.com](mailto:jianguoxu2014@126.com)

**Keywords:** vitamin D; pathway; polymorphism; gestational diabetes mellitus; Pathology Section

**Received:** July 13, 2016

**Accepted:** September 07, 2016

**Published:** September 12, 2016

### ABSTRACT

**Vitamin D (VD) deficiency during pregnancy has been repeatedly linked to an increased gestational diabetes mellitus (GDM) risk. We sought to determine the influences of genetic variants in vitamin D signaling pathways on the risk of GDM. In this study, we genotyped 15 single nucleotide polymorphisms (SNPs) within 8 representative genes (*CYP27A1*, *CYP27B1*, *CYP24A1*, *VDR*, *RXRA*, *RXRB*, *RXRG* and *GC*) of the vitamin D signaling pathways in a case-control study with 964 GDM cases and 1,021 controls using the Sequenom MassARRAY iPLEX platform. Logistic regression analyses in additive model showed that *GC* rs16847024 C>T, *RXRG* rs17429130 G>C and *RXRA* rs4917356 T>C were significantly associated with the increased risk of GDM (adjusted OR = 1.31, 95% CI = 1.10-1.58 for rs16847024; adjusted OR = 1.28, 95% CI = 1.04-1.57 for rs17429130; adjusted OR = 1.28, 95% CI = 1.06-1.54 for rs4917356). And GDM risk significantly increased with the increasing number of variant alleles of the three SNPs in a dose-dependent manner (*P* for trend < 0.001). Moreover, the combined effect of the three SNPs on GDM occurrence was more prominent in older women (age > 30). Further interactive analyses also detected a significantly multiplicative interaction between the combined variant alleles and age on GDM risk (*P* = 0.035). Together, these findings indicate that *GC* rs16847024, *RXRG* rs17429130 and *RXRA* rs4917356 were candidate susceptibility markers for GDM in Chinese females. Further validation studies with different ethnic background and biological function analyses were needed.**

### INTRODUCTION

Gestational diabetes mellitus (GDM) is defined as glucose intolerance with onset or first recognition during pregnancy [1], which has become a significant health problem globally. It has been reported that GDM affects 1%-14% of all pregnancies, and that its incidence has been steadily rising [2]. GDM not just increase the risk

of adverse pregnancy outcomes, but also has lots of long-term health impacts on both mothers and their offspring, including susceptibility to obesity, type 2 diabetes mellitus (T2DM) and metabolic syndrome in later life [3, 4]. Therefore, early intervention of the risk factors for GDM and early detection may be the key to improve the prognosis. Accumulating evidence has indicated that risk factors for GDM include advanced maternal age, pre-

pregnancy overweight and obesity, history of subfertility or infertility and family history of diabetes [5, 6]. In addition, available data suggest that GDM have a familial tendency, and it recurs in at least 30% of women with a history of GDM [7, 8], supporting a genetic component in the etiology of GDM.

In the past decade, vitamin D (VD) deficiency and insufficiency during pregnancy has also been repeatedly linked to an increased GDM risk [9, 10]. Although the most widely accepted physiological role of VD is to maintain calcium and phosphate levels for bone formation [11], it is now clear that VD also has a range of non-calcitropic functions, such as stimulating insulin production and participating in the pathological processes of T2DM [12, 13]. In humans, a vast majority of VD is synthesized through photochemical conversion of 7-dehydrocholesterol to pre-vitamin D<sub>3</sub> in the skin, and the latter is sequentially metabolized in the liver and kidneys [14]. The active metabolite of vitamin D, 1 $\alpha$ ,25(OH)<sub>2</sub>D<sub>3</sub>, is mainly produced by 2 hydroxylases: 25-hydroxylase (encoded by the gene *CYP27A1*) in the liver and 1 $\alpha$ -hydroxylase (encoded by the gene *CYP27B1*) in the kidney. *CYP24A1* is strongly induced by the action of 1 $\alpha$ ,25(OH)<sub>2</sub>D<sub>3</sub>, plays an important role in the production of the less active VD metabolites. The Vitamin D receptor (VDR), a member of the steroid hormone receptor superfamily, functions as a transcriptional activator of numerous genes, which is essential for VD activity. The 1 $\alpha$ ,25(OH)<sub>2</sub>D<sub>3</sub>-VDR-dependent transcriptional activity is modulated through synergistic ligand-binding and dimerization with retinoic X receptor (RXR) [14]. Additionally, the VD-binding protein (group-specific component protein, GC), which serves to deliver VD to target tissues, is specifically responsible for VD endocytosis [15]. Recently, multiple loci in *CYP27A1*, *CYP27B1*, *CYP24A1*, *VDR*, *RXR* and *GC* genes were found to be associated with vitamin D levels [16]. It is reported that maternal serum VD levels increase up to twofold starting at 10-12 weeks' gestation and reaching a maximum in the third trimester, suggesting an important role for VD in obstetric well-being [17].

Numerous studies have suggested that VD plays important roles in  $\beta$ -cell function and impaired glucose tolerance in GDM [18, 19], therefore, we hypothesized that genetic variants in VD signaling pathways that influence VD levels could predispose to GDM. To test this hypothesis, we selected 15 single nucleotide polymorphisms (SNPs) within 8 representative genes (*CYP27A1*, *CYP27B1*, *CYP24A1*, *VDR*, *RXRA*, *RXRB*, *RXRG* and *GC*) encoding the core proteins involved in VD synthesis and catabolism, and performed a case-control study including 964 GDM cases and 1,021 controls to test the association between these polymorphisms and the risk of GDM.

## RESULTS

Selected characteristics of the 964 GDM cases and 1,021 controls are described in Table S1. As expected, there were similar distributions of age and pre-pregnancy body mass index (BMI) between the two groups ( $P = 0.094$  and  $0.685$ , respectively). However, there were more multiparous women among GDM cases than among controls ( $P < 0.001$ ). And the rates of abnormal pregnancy history and family history of diabetes were also significant higher among GDM cases ( $P < 0.05$  for all comparisons).

Logistic regression analyses were used to examine the associations between the 15 studied SNPs and GDM susceptibility by using different genetic models. The observed genotype frequencies for the 15 SNPs among the controls were all in Hardy-Weinberg equilibrium ( $P > 0.05$  for all SNPs). As shown in Tables 1-2, *GC* rs16847024 C>T, *RXRG* rs17429130 G>C and *RXRA* rs4917356 T>C were significantly associated with the increased risk of GDM using the additive model (adjusted OR = 1.31, 95% CI = 1.10-1.58 for rs16847024; adjusted OR = 1.28, 95% CI = 1.04-1.57 for rs17429130; adjusted OR = 1.28, 95% CI = 1.06-1.54 for rs4917356), but not others. We then used conditional logistic regression analyses to test the independence of the three significant SNPs. The effects of rs16847024, rs17429130 and rs4917356 on GDM occurrence remained in existence after being conditioned on the other two SNPs (Table S2).

Then, we evaluated combined effects by adding up the number of variant alleles of the independent SNPs on GDM occurrence (rs16847024-T, rs17429130-C and rs4917356-C). The "0" allele means subjects with wild-type homozygotes of the three SNPs; "1-6" alleles means carrying one to six variant alleles of the three SNPs. As shown in Table 3, the risk of GDM was significantly increased with the increasing number of variant alleles of the three SNPs in a dose dependent manner ( $P$  for trend  $< 0.001$ ). Subjects carrying "1-2" variant alleles had a 39% increase in GDM risk (95% CI = 1.16-1.67), compared with subjects with "0" allele. And subjects carrying "3-6" variant alleles had an even higher risk of GDM (adjusted OR = 1.98, 95% CI = 1.10-3.56), when compared with subjects with "0" allele (Table 3).

The combined effects of the three SNPs on GDM occurrence were also evaluated by stratifying on age, pre-pregnancy BMI, parity, abnormal pregnancy history and family history of diabetes (Table 4). Similar association strengths were shown between most subgroups ( $P > 0.05$  for heterogeneity test). Interestingly, a stronger combined effect of the three SNPs on GDM occurrence was observed among older women (age  $> 30$ ) (adjusted OR = 1.68, 95% CI = 1.30-2.17) compared with that in younger women (age  $\leq 30$ ) (adjusted OR = 1.19, 95% CI = 0.95-1.49) ( $P = 0.047$  for heterogeneity test). Further interactive analyses also detected a significantly multiplicative interaction between the combined variant alleles and age on GDM

**Table 1: Genotyping results in GDM cases and controls**

| SNP               | Base chang <sup>a</sup> | Gene    | Location    | MAF <sup>b</sup> | Reported MAF <sup>c</sup> | P value        |                 |                |
|-------------------|-------------------------|---------|-------------|------------------|---------------------------|----------------|-----------------|----------------|
|                   |                         |         |             |                  |                           | Dominant model | Recessive model | Additive model |
| rs2248137         | C>G                     | CYP24A1 | chr20q13.2  | 0.431            | 0.413                     | 0.365          | 0.845           | 0.478          |
| rs2259735         | C>T                     | CYP24A1 | chr20q13.2  | 0.309            | 0.330                     | 0.675          | 0.479           | 0.996          |
| rs4674343         | A>G                     | CYP27A1 | chr2q35     | 0.174            | 0.151                     | 0.275          | 0.237           | 0.183          |
| rs4646536         | G>A                     | CYP27B1 | chr12q14.1  | 0.357            | 0.364                     | 0.389          | 0.662           | 0.671          |
| rs4341603         | G>T                     | VDR     | chr12q13.11 | 0.408            | 0.403                     | 0.140          | 0.433           | 0.153          |
| rs7136534         | C>T                     | VDR     | chr12q13.11 | 0.369            | 0.408                     | 0.106          | 0.500           | 0.137          |
| rs739837          | G>T                     | VDR     | chr12q13.11 | 0.267            | 0.282                     | 0.663          | 0.553           | 0.914          |
| rs28465650        | A>G                     | RXRA    | chr9q34.2   | 0.162            | 0.180                     | 0.536          | 0.996           | 0.599          |
| rs34835001        | T>C                     | RXRA    | chr9q34.2   | 0.235            | 0.223                     | 0.769          | 0.508           | 0.995          |
| rs3818740         | T>C                     | RXRA    | chr9q34.2   | 0.217            | 0.199                     | 0.708          | 0.165           | 0.838          |
| <b>rs4917356</b>  | T>C                     | RXRA    | chr9q34.2   | 0.110            | 0.121                     | <b>0.036</b>   | <b>0.020</b>    | <b>0.011</b>   |
| rs1805343         | A>G                     | RXRA    | chr9q34.2   | 0.341            | 0.335                     | 0.333          | 0.580           | 0.654          |
| rs166899          | C>T                     | RXRG    | chr1q23.3   | 0.212            | 0.180                     | 0.079          | 0.326           | 0.067          |
| <b>rs17429130</b> | G>C                     | RXRG    | chr1q23.3   | 0.092            | 0.126                     | <b>0.044</b>   | <b>0.035</b>    | <b>0.017</b>   |
| <b>rs16847024</b> | C>T                     | GC      | chr4q13.3   | 0.120            | 0.141                     | <b>0.006</b>   | 0.074           | <b>0.003</b>   |

Notes: <sup>a</sup> Major > minor allele; <sup>b</sup> MAF in 1021 controls; <sup>c</sup> Reported MAF in Han Chinese from 1,000 genomes. Bold value denotes statistical significance. Abbreviations: GDM, gestational diabetes mellitus; SNP, single nucleotide polymorphism; MAF, minor allele frequency.

**Table 2: Association between 3 significant SNPs and GDM susceptibility**

| Genotype   | GDM cases (n = 964)<br>N (%) | Controls (n = 1021)<br>N (%) | OR (95%CI)       | P     | OR (95%CI) a     | P <sup>a</sup> |
|------------|------------------------------|------------------------------|------------------|-------|------------------|----------------|
| rs16847024 |                              |                              |                  |       |                  |                |
| CC         | 695 (72.4)                   | 791 (77.8)                   | 1.00             |       | 1.00             |                |
| CT         | 237 (24.7)                   | 208 (20.5)                   | 1.30 (1.05-1.60) | 0.016 | 1.30 (1.04-1.61) | 0.018          |
| TT         | 28 (2.9)                     | 18 (1.8)                     | 1.77 (0.97-3.23) | 0.062 | 1.83 (1.00-3.38) | 0.051          |
| Additive   |                              |                              | 1.31 (1.09-1.57) | 0.003 | 1.31 (1.10-1.58) | 0.003          |
| rs17429130 |                              |                              |                  |       |                  |                |
| GG         | 760 (78.9)                   | 838 (82.6)                   | 1.00             |       | 1.00             |                |
| GC         | 182 (18.9)                   | 166 (16.4)                   | 1.21 (0.96-1.53) | 0.109 | 1.20 (0.95-1.52) | 0.128          |
| CC         | 21 (2.2)                     | 10 (1.0)                     | 2.32 (1.08-4.95) | 0.030 | 2.31 (1.07-5.00) | 0.034          |
| Additive   |                              |                              | 1.29 (1.05-1.57) | 0.014 | 1.28 (1.04-1.57) | 0.017          |
| rs4917356  |                              |                              |                  |       |                  |                |
| TT         | 732 (76.5)                   | 806 (79.4)                   | 1.00             |       | 1.00             |                |
| CT         | 197 (20.6)                   | 194 (19.1)                   | 1.12 (0.90-1.40) | 0.324 | 1.19 (0.95-1.49) | 0.131          |
| CC         | 28 (2.9)                     | 15 (1.5)                     | 2.06 (1.09-3.88) | 0.026 | 2.18 (1.14-4.15) | 0.018          |
| Additive   |                              |                              | 1.21 (1.01-1.46) | 0.042 | 1.28 (1.06-1.54) | 0.011          |

Note: <sup>a</sup> Logistic regression analyses adjusted for age, pre-pregnancy BMI, parity, abnormal pregnancy history and family history of diabetes. Abbreviations: GDM, gestational diabetes mellitus; SNP, single nucleotide polymorphism.

**Table 3: Cumulative effects of variant alleles on GDM susceptibility**

| Variables                                                      | GDM cases ( <i>n</i> = 964)<br><i>N</i> (%) | Controls ( <i>n</i> = 1021) <i>N</i> (%) | OR (95%CI)                    | <i>P</i> | OR (95%CI) <sup>a</sup>       | <i>P</i> <sup>a</sup> |
|----------------------------------------------------------------|---------------------------------------------|------------------------------------------|-------------------------------|----------|-------------------------------|-----------------------|
| Combined effects of rs16847024-T, rs17429130-C and rs4917356-C |                                             |                                          |                               |          |                               |                       |
| 0                                                              | 418 (43.77)                                 | 521 (51.84)                              | 1.00                          |          | 1.00                          |                       |
| 1-2                                                            | 507 (53.09)                                 | 464 (46.17)                              | 1.36 (1.14-1.63)              | 0.001    | 1.39 (1.16-1.67)              | < 0.001               |
| 3-6                                                            | 30 (3.14)                                   | 20 (1.99)                                | 1.87 (1.05-3.34)              | 0.035    | 1.98 (1.10-3.56)              | 0.023                 |
| Trend                                                          |                                             |                                          | <i>P</i> <sup>b</sup> < 0.001 |          | <i>P</i> <sup>b</sup> < 0.001 |                       |

Note: <sup>a</sup> Logistic regression analyses adjusted for age, pre-pregnancy BMI, parity, abnormal pregnancy history and family history of diabetes. <sup>b</sup> *P* value of Cochran-Armitage's trend test. Abbreviation: GDM, gestational diabetes mellitus; BMI, body mass index.

**Table 4: Stratified analyses on the combined effects of the three SNPs with GDM susceptibility**

| Variables                            | 0/1-2/3-6 allele (s)                  |                                             | OR (95%CI)       | <i>P</i> <sup>b</sup> | OR (95%CI) <sup>a</sup> | <i>P</i> <sup>b</sup> |
|--------------------------------------|---------------------------------------|---------------------------------------------|------------------|-----------------------|-------------------------|-----------------------|
|                                      | GDM<br>( <i>n</i> = 964) <i>N</i> (%) | Controls<br>( <i>n</i> = 1021) <i>N</i> (%) |                  |                       |                         |                       |
| Age, year                            |                                       |                                             |                  |                       |                         |                       |
| ≤ 30                                 | 221/246/14                            | 314/289/16                                  | 1.18 (0.95-1.47) | 0.052                 | 1.19 (0.95-1.49)        | 0.047                 |
| > 30                                 | 197/261/16                            | 207/175/4                                   | 1.64 (1.28-2.11) |                       | 1.68 (1.30-2.17)        |                       |
| Pre-pregnancy BMI, kg/m <sup>2</sup> |                                       |                                             |                  |                       |                         |                       |
| ≤ 22                                 | 217/267/15                            | 262/245/8                                   | 1.35 (1.08-1.70) | 0.929                 | 1.40 (1.11-1.78)        | 1.000                 |
| > 22                                 | 201/240/15                            | 259/219/12                                  | 1.37 (1.09-1.73) |                       | 1.40 (1.11-1.78)        |                       |
| Parity                               |                                       |                                             |                  |                       |                         |                       |
| Nulliparae                           | 358/434/27                            | 481/436/20                                  | 1.34 (1.13-1.59) | 0.281                 | 1.34 (1.12-1.59)        | 0.497                 |
| Multiparae                           | 60/73/3                               | 40/28/0                                     | 1.86 (1.05-3.29) |                       | 1.68 (0.90-3.16)        |                       |
| Abnormal pregnancy history           |                                       |                                             |                  |                       |                         |                       |
| No                                   | 362/450/27                            | 499/448/19                                  | 1.39 (1.17-1.64) | 0.884                 | 1.39 (1.17-1.65)        | 0.903                 |
| Yes                                  | 56/57/3                               | 22/16/1                                     | 1.32 (0.67-2.59) |                       | 1.46 (0.68-3.16)        |                       |
| Family history of diabetes           |                                       |                                             |                  |                       |                         |                       |
| No                                   | 346/414/24                            | 448/397/18                                  | 1.34 (1.12-1.60) | 0.689                 | 1.36 (1.14-1.64)        | 0.761                 |
| Yes                                  | 72/93/6                               | 73/67/2                                     | 1.47 (0.97-2.23) |                       | 1.46 (0.96-2.22)        |                       |

Note: <sup>a</sup> Logistic regression analyses adjusted for age, pre-pregnancy BMI, parity, abnormal pregnancy history and family history of diabetes (excluded the stratified factor in each stratum). <sup>b</sup> *P*-value for the heterogeneity test. Abbreviations: GDM, gestational diabetes mellitus; SNP, single nucleotide polymorphism; BMI, body mass index.

risk (*P* = 0.035) (Table 5). Crossover analysis suggested that the older women (age > 30) with "1-2" alleles (i.e., rs16847024-T, rs17429130-C and rs4917356-C) and "3-6" alleles were associated with significantly increased risk of GDM (adjusted OR = 2.02, 95% CI = 1.55-2.62, *P* < 0.001; adjusted OR = 5.75, 95% CI = 1.88-17.60, *P* = 0.002, respectively), as compared with the younger women (age ≤ 30) with "0" alleles (Table 5).

## DISCUSSION

In this study, we investigated the association between genetic variants in vitamin D signaling pathways and risk of GDM in Southeast Han Chinese populations. We found that *GC* rs16847024 C>T, *RXRG* rs17429130 G>C and *RXRA* rs4917356 T>C were significantly associated with the increased risk of GDM. And the GDM risk significantly increased with the increasing number of variant alleles of the three SNPs in a dose-dependent manner.

**Table 5: Interaction analyses on the combined effects of the three SNPs and age on GDM susceptibility**

| Alleles     | Age  | GDM cases ( <i>n</i> = 964) <i>N</i> (%) | Controls ( <i>n</i> = 1021) <i>N</i> (%) | OR (95%CI)                    | <i>P</i> |
|-------------|------|------------------------------------------|------------------------------------------|-------------------------------|----------|
| 0           | ≤ 30 | 221 (23.1)                               | 314 (31.2)                               | 1.00                          |          |
| 1-2         | ≤ 30 | 246 (25.8)                               | 289 (28.8)                               | 1.21 (0.95-1.55)              | 0.122    |
| 3-6         | ≤ 30 | 14 (1.5)                                 | 16 (1.6)                                 | 1.27 (0.60-2.68)              | 0.532    |
| 0           | > 30 | 197 (20.6)                               | 207 (20.6)                               | 1.24 (0.95-1.62)              | 0.115    |
| 1-2         | > 30 | 261 (27.3)                               | 175 (17.4)                               | 2.02 (1.55-2.62)              | < 0.001  |
| 3-6         | > 30 | 16 (1.7)                                 | 4 (0.4)                                  | 5.75 (1.88-17.60)             | 0.002    |
| Interaction |      |                                          |                                          | <sup>a</sup> <i>P</i> = 0.035 |          |

Note: Logistic regression analyses adjusted for pre-pregnancy BMI, parity, abnormal pregnancy history and family history of diabetes. <sup>a</sup> *P* -value for the heterogeneity test. Abbreviations: GDM, gestational diabetes mellitus; SNP, single nucleotide polymorphism.

To date, accumulating data has showed that VD deficiency has been related with numerous health outcomes, including heart disease, hypertension, autoimmune disease, infectious disease, cancer, type 1 diabetes, T2DM and GDM [20, 21]. Several studies have found that the genetic variants of the genes in VD signaling pathways were associated with the concentrations of VD [16]. In a case-control study conducted in the north of China demonstrated an association between GC variants and GDM, as well as a relation between a subset of loci in *CYP2R1*, *CYP24A1* and *VDR* and clinical parameters related to GDM [22]. Recently, a study performed on a population of pregnant Iranian women also showed a significant association between *VDR* *Apal* and *TaqI* gene polymorphisms and the risk of GDM [23]. Furthermore, randomized clinical trial showed that VD supplementation could decrease the incidence of GDM [24], which might provide further evidence for the importance of the role of VD in the GDM occurrence.

Variants in *GC* have previously been reported in association with T2DM and quantitative traits connected with diabetes mellitus, including plasma glucose, insulin concentrations, and insulin resistance [25, 26]. The SNP rs16847024 (C>T) is located at the 5' flanking region of *GC*. According to the web-based SNP analysis tool (SNPinfo: <http://snpinfo.niehs.nih.gov/snpinfo/snpfunc.htm>), rs16847024 may be located at transcription factor binding site, which is likely to involve in gene regulation including promoter activation or repression depending on its interacted protein. In the present study, the allele-T conferred risk effect for the GDM occurrence at the rs16847024 locus. It has also been reported that rs16847024 was related to high-sensitivity C-reactive protein levels, which is one of important inflammatory factors [22]. RXR, retinoic X receptors, are transcription factors with important roles in development, reproduction, homeostasis, and cell differentiation. There are typically three copies of the gene, *RXRA* (*NR2B1/RXRα*), *RXRB* (*NR2B2/RXRβ*) and *RXRG* (*NR2B3/RXRγ*) [27]. We

found rs17429130 in *RXRG* and rs4917356 in *RXRA* were associated with the GDM susceptibility. The SNP rs17429130 (G>C) is located at the 3'-untranslated region of *RXRG*. Interestingly, rs17429130 may be located at miRNA-binding site according to the above SNP analysis tool, which is likely to disrupt miRNA-target interaction and result in the deregulation of target gene expression. For rs4917356 (T>C), although it is located at the intron of *RXRA*, it is associated with the expression of *RXRA* according to the database of GTExPortal (<http://www.gtexportal.org>). These evidences for the three SNPs seems to be biologically plausible, but further functional analysis of the regions including the three SNPs, is needed. We also observed a significant interaction between the combined alleles and age on GDM risk. Advanced maternal age has been recognized as one of major causes of pregnancy complications, especially for GDM [5], and VD deficiency and insufficiency widely exists in the older pregnant women, which may help explain the interaction observed, although the underlying mechanisms are not fully elucidated.

GDM occurrence was the result of the combined effect of multiple risk factors and multiple genes, each of which could not be despised. Genome wide association (GWA) studies are proving adept at identifying common variants contributing to the inherited component of common diseases. Almost all such variants seem to have low or modest effect sizes [28]. In this study, the effects of the three SNPs (rs16847024, rs17429130 and rs4917356) were also modest. However it may be helpful to explain the "missing heritability" to some extent. Our study had a number of strengths. First of all, our GDM cases and controls came from a systematic screening of pregnancy complications in a large, population-based study conducted in Nanjing, and the two groups were well matched on age and pre-pregnancy BMI, which may have reduced potential selection bias. Moreover, the relatively large sample size in this study provided enough statistical power. In this study, the vitamin D level was not measured

in all subjects, which was the major limitation. Multiple loci in VD signaling pathways (*CYP27A1*, *CYP27B1*, *CYP24A1*, *VDR*, *RXR* and *GC* genes) were found to be associated with vitamin D levels [16], so it is plausible that common variants in these genes that influence vitamin D level could predispose to GDM. Further studies involving the association of the three SNPs with vitamin D level are needed. And some reported risk factors for GDM, such as poor diet, low physical activity, polycystic ovarian syndrome [5, 6], were not considered for adjustment in this study. Therefore, the results should be treated with caution, and validations are warranted.

Taken together, our study suggested that *RXRA*, *RXRG*, and *GC* loci are candidate susceptibility regions that have some marker SNPs for GDM in Han Chinese. Further studies with functional assays conducted in diverse populations are needed to validate and extend our findings.

## MATERIALS AND METHODS

### Study subjects

The study was approved by the institutional review board of Nanjing Maternity and Child Health Care Institute (Nanjing, China), and the methods were carried out in accordance with the approved guidelines. The case-control study was conducted on the basis of a study population of more than 80,000 women who attending pregnancy complications screening between March 2012 and February 2015 in Nanjing Maternity and Child Health Care Hospital (Nanjing, China). The GDM cases and controls were randomly selected from the maternal screening population by using a computerized random number function. All participants were offered a glucose challenge test (GCT) between weeks 24 and 28 of gestation. The GDM cases were defined as the pregnant women with fasting glucose concentration  $\geq 5.5$  mmol/L or 2-h plasma glucose concentration  $\geq 8.0$  mmol/L [29]. Women diagnosed with diabetes before pregnancy were excluded from this study. The pregnant women without diabetes were included as controls. The selected controls were matched to the GDM cases on age and pre-pregnancy BMI, and declared no previous metabolic diseases. As a result, 964 GDM cases and 1021 controls consented to participate in the study. All cases and controls were unrelated ethnic Han Chinese. After written informed consent was obtained, each participant was scheduled for an interview by using a structured questionnaire to collect demographic information and potential risk factors, such as age, pre-pregnancy height and weight, parity, abnormal pregnancy history and family history of diabetes.

### SNPs selection and genotyping

Based on the data from UCSC database (GRCh37/hg19), common SNPs associated with core components (*CYP27A1*, *CYP27B1*, *CYP24A1*, *VDR*, *RXRA*, *RXRB*, *RXRG* and *GC*) of VD signaling pathways were included for initial analysis. The selected SNPs had minor allele frequency (MAF) larger than 0.05 in Chinese/Asians and were located at the 5' flanking regions, 5'-untranslated regions (5'-UTRs), coding regions, or 3'-UTRs according to NCBI dbSNP data (last search date: December 2015). We also included SNPs with biological significance or those that were associated with gene expression according to Regulome Database. If SNPs are in high linkage disequilibrium ( $r^2 > 0.8$ ), we would genotype only one SNP. As a result, 15 SNPs (rs2248137 and rs2259735 in *CYP24A1*; rs4674343 in *CYP27A1*; rs4646536 in *CYP27B1*; rs4341603, rs7136534 and rs739837 in *VDR*; rs28465650, rs34835001, rs3818740, rs4917356 and rs1805343 in *RXRA*; rs166899 and rs17429130 in *RXRG*; and rs16847024 in *GC*) were selected for genotyping (Table 1).

Genomic DNA was extracted from leukocyte pellets by traditional proteinase K digestion and followed by phenol-chloroform extraction and ethanol precipitation. All SNPs were genotyped using the Sequenom MassARRAY iPLEX platform (Sequenom Inc., CA). The information on primers is shown in Table S3. The genotyping assays was performed without knowing the subjects' case and control status. Two blank controls (water) in each 384-well plate were used for quality control and more than 10% samples were randomly selected to repeat, yielding a 100% concordance. The success rates of genotyping for these SNPs were all above 98.5%.

### Statistical analyses

Differences of selected characteristics and genotype frequencies of SNPs between the GDM cases and controls were calculated by the Student's *t*-test (for continuous variables) and  $\chi^2$  test (for categorical variables). Both univariate and multivariate logistic regression analyses were used to estimate the associations between the genotypes and GDM risk by computing odds ratios (OR) and their 95% confidence intervals (CIs). The Cochran-Armitage test was used for trend analyses. The  $\chi^2$ -based Q test was used to assess the heterogeneity of associations among subgroups. All the statistical analyses were performed with SAS 9.1.3 software (SAS Institute, Cary, NC), and  $P < 0.05$  in a two-sided test was considered statistically significant.

## ACKNOWLEDGMENTS

This work was supported in part by the Nanjing Science and Technology Bureau of Jiangsu Province (201405042, ZKX14042), Nanjing Medical Science and Technique Development Foundation (QRX11110), the National Key Basic Research Program of China (2013CB530604), the National Natural Science Foundation of China (81600685), the Natural Science Foundation of Jiangsu Province (BK20160141), and the Science and Technology Development Fund of the Nanjing Medical University (2015NJMUZD062).

## CONFLICTS OF INTERESTS

The authors have declared that no competing interests exist.

## Authors' Contributions

JG X designed the study. AW S, JW, GQ L, HL, ZY F, and JZ collected the data. JW and GQ L did the statistical analysis and interpretation. AW S wrote the report. JG X revised the report. All authors reviewed the report and approved the final version.

## REFERENCES

1. Reece EA, Leguizamon G, Wiznitzer A. Gestational diabetes: the need for a common ground. *Lancet*. 2009;373:1789-1797.
2. Bener A, Saleh NM, Al-Hamaq A. Prevalence of gestational diabetes and associated maternal and neonatal complications in a fast-developing community: global comparisons. *Int J Womens Health*. 2011;3:367-373.
3. Nar G, Inci S, Aksan G, Unal OK, Nar R, Soyulu K. The relationship between epicardial fat thickness and gestational diabetes mellitus. *Diabetol Metab Syndr*. 2014;6:120.
4. Bellamy L, Casas JP, Hingorani AD, Williams D. Type 2 diabetes mellitus after gestational diabetes: a systematic review and meta-analysis. *Lancet*. 2009;373:1773-1779.
5. Zhang C, Ning Y. Effect of dietary and lifestyle factors on the risk of gestational diabetes: review of epidemiologic evidence. *Am J Clin Nutr*. 2011;94:1975S-1979S.
6. Reyes-Munoz E, Castellanos-Barroso G, Ramirez-Eugenio BY, Ortega-Gonzalez C, Parra A, Castillo-Mora A, De la Jara-Diaz JF. The risk of gestational diabetes mellitus among Mexican women with a history of infertility and polycystic ovary syndrome. *Fertil Steril*. 2012;97:1467-1471.
7. Kim C, Berger DK, Chamany S. Recurrence of gestational diabetes mellitus: a systematic review. *Diabetes Care*. 2007;30:1314-1319.
8. Zhang C, Bao W, Rong Y, Yang H, Bowers K, Yeung E, Kiely M. Genetic variants and the risk of gestational diabetes mellitus: a systematic review. *Hum Reprod Update*. 2013;19:376-390.
9. Zhang MX, Pan GT, Guo JF, Li BY, Qin LQ, Zhang ZL. Vitamin D Deficiency Increases the Risk of Gestational Diabetes Mellitus: A Meta-Analysis of Observational Studies. *Nutrients*. 2015;7:8366-8375.
10. Lu M, Xu Y, Lv L, Zhang M. Association between vitamin D status and the risk of gestational diabetes mellitus: a meta-analysis. *Arch Gynecol Obstet*. 2016;293:959-966.
11. Bell TD, Demay MB, Burnett-Bowie SA. The biology and pathology of vitamin D control in bone. *J Cell Biochem*. 2010;111:7-13.
12. Ponsonby AL, Lucas RM, Lewis S, Halliday J. Vitamin D status during pregnancy and aspects of offspring health. *Nutrients*. 2010;2:389-407.
13. Baz-Hecht M, Goldfine AB. The impact of vitamin D deficiency on diabetes and cardiovascular risk. *Curr Opin Endocrinol Diabetes Obes*. 2010;17:113-119.
14. Deeb KK, Trump DL, Johnson CS. Vitamin D signalling pathways in cancer: potential for anticancer therapeutics. *Nat Rev Cancer*. 2007;7:684-700.
15. Nykjaer A, Dragun D, Walther D, Vorum H, Jacobsen C, Herz J, Melsen F, Christensen EI, Willnow TE. An endocytic pathway essential for renal uptake and activation of the steroid 25-(OH) vitamin D3. *Cell*. 1999;96:507-515.
16. Jolliffe DA, Walton RT, Griffiths CJ, Martineau AR. Single nucleotide polymorphisms in the vitamin D pathway associating with circulating concentrations of vitamin D metabolites and non-skeletal health outcomes: Review of genetic association studies. *J Steroid Biochem Mol Biol*. 2015.
17. Brannon PM, Picciano MF. Vitamin D in pregnancy and lactation in humans. *Annu Rev Nutr*. 2011;31:89-115.
18. Lacroix M, Battista MC, Doyon M, Houde G, Menard J, Ardilouze JL, Hivert MF, Perron P. Lower vitamin D levels at first trimester are associated with higher risk of developing gestational diabetes mellitus. *Acta Diabetol*. 2014;51:609-616.
19. Joergensen JS, Lamont RF, Torloni MR. Vitamin D and gestational diabetes: an update. *Curr Opin Clin Nutr Metab Care*. 2014;17:360-367.
20. Pilz S, Verheyen N, Grubler MR, Tomaschitz A, Marz W. Vitamin D and cardiovascular disease prevention. *Nat Rev Cardiol*. 2016;13:404-417.
21. Muscogiuri G, Mitri J, Mathieu C, Badenhoop K, Tamer G, Orio F, Mezza T, Vieth R, Colao A, Pittas A. Mechanisms in endocrinology: vitamin D as a potential contributor in endocrine health and disease. *Eur J Endocrinol*. 2014;171:R101-110.
22. Wang Y, Wang O, Li W, Ma L, Ping F, Chen L, Nie M. Variants in Vitamin D Binding Protein Gene Are Associated With Gestational Diabetes Mellitus. *Medicine*. (Baltimore) 2015;94:e1693.

23. Rahmannedhad G, Mashayekhi FJ, Goodarzi MT, Rezvanfar MR, Sadeghi A. Association between vitamin D receptor ApaI and TaqI gene polymorphisms and gestational diabetes mellitus in an Iranian pregnant women population. *Gene*. 2016;581:43-47.
24. Mojibian M, Soheilykhah S, Fallah Zadeh MA, Jannati Moghadam M. The effects of vitamin D supplementation on maternal and neonatal outcome: A randomized clinical trial. *Iran J Reprod Med*. 2015;13:687-696.
25. Hirai M, Suzuki S, Hinokio Y, Chiba M, Kasuga S, Hirai A, Toyota T. Group specific component protein genotype is associated with NIDDM in Japan. *Diabetologia*. 1998;41:742-743.
26. Hirai M, Suzuki S, Hinokio Y, Hirai A, Chiba M, Akai H, Suzuki C, Toyota T. Variations in vitamin D-binding protein (group-specific component protein) are associated with fasting plasma insulin levels in Japanese with normal glucose tolerance. *J Clin Endocrinol Metab*. 2000;85:1951-1953.
27. Philip S, Castro LF, da Fonseca RR, Reis-Henriques MA, Vasconcelos V, Santos MM, Antunes A. Adaptive evolution of the Retinoid X receptor in vertebrates. *Genomics*. 2012;99:81-89.
28. McCarthy MI, Abecasis GR, Cardon LR, Goldstein DB, Little J, Ioannidis JP, Hirschhorn JN. Genome-wide association studies for complex traits: consensus, uncertainty and challenges. *Nat Rev Genet*. 2008;9:356-369.
29. Hoffman L, Nolan C, Wilson JD, Oats JJ, Simmons D. Gestational diabetes mellitus—management guidelines. The Australasian Diabetes in Pregnancy Society. *Med J Aust*. 1998;169:93-97.
